# Supplementary material for: Natural Variation Identifies ICARUS1, a Universal Gene Required for Cell Proliferation and Growth at High Temperatures in Arabidopsis thaliana
Source: PLoS Genet. 2015 May 7;11(5):e1005085. doi: 10.1371/journal.pgen.1005085 (PMC4423873; doi:10.1371/journal.pgen.1005085)
Supplement: S6 Table — Overlapping set of genes that showed differential expression between Sij-4 and Col-0 at 27°C with the published data from [41], was compared through Chi-square analysis. The chi-square value was calculated for each phase of the cell cycle by analyzing whether the up regulation/down regulation in Sij-4 deviates from the expectation based on the proportion of up regulated or down regulated genes in the total list of differentially expressed genes. (XLS) [file pgen.1005085.s015.xls]

## Sheet: Sheet1
Cell cycle phase	Expression change	Observed Number of genes	Expected number of genes	Chi-square value	p-value
S-phase	Up regulated in Sij-4	19	49	29.34	<0.0001
	Down regulated in Sij-4	112	82
G1-phase	Up regulated in Sij-4	26	26	0	NS
	Down regulated in Sij-4	43	43
G2-phase	Up regulated in Sij-4	19	15	1.7	NS
	Down regulated in Sij-4	21	25
M-phase	Up regulated in Sij-4	17	57	39.98	<0.0001
	Down regulated in Sij-4	131	97
