# Supplementary material for: Natural Variation Identifies ICARUS1, a Universal Gene Required for Cell Proliferation and Growth at High Temperatures in Arabidopsis thaliana
Source: PLoS Genet. 2015 May 7;11(5):e1005085. doi: 10.1371/journal.pgen.1005085 (PMC4423873; doi:10.1371/journal.pgen.1005085)
Supplement: S10 Table — logFC: log fold change; logCPM: log counts per million; LR: likelihood ratio, p-value: p-value for the differential expression; FDR: False Discovery Rate. (XLS) [file pgen.1005085.s019.xls]

## Sheet: Sheet1
No	gene ID	annotation (MIPS/TAIR)	Down regulation in Sij4 at 27ºC	logFC	logCPM	LR	PValue	FDR
1	At1g44110	Arath;CYCA1;1	Y	1.33454	2.29556	16.5879	4.64456e-05	0.000434056
2	At5g11300	Arath;CYCA2;2	N	N	N	N	N	N
3	At5g06150	Arath;CYCB1;2	Y	1.53587	2.38882	24.815	6.31049e-07	9.54826e-06
4	At3g11520	Arath;CYCB1;3	Y	1.30307	1.16784	13.1487	0.000287713	0.00212678
5	At2g26760	Arath;CYCB1;4	Y	1.4381	1.58065	19.6056	9.51882e-06	0.00010779
6	At1g34460	Arath;CYCB1;5	N	N	N	N	N	N
7	At2g17620	Arath;CYCB2;1	Y	1.46256	-0.612994	7.88811	0.00497609	0.0236993
8	At4g35620	Arath;CYCB2;2	Y	2.25407	0.878173	28.8977	7.63019e-08	1.38246e-06
9	At1g76310	Arath;CYCB2;4	Y	1.76521	1.44753	23.9945	9.66089e-07	1.39438e-05
10	At1g20590	Arath;CYCB2;5	N	N	N	N	N	N
11	At1g16330	Arath;CYCB3;1	Y	1.56067	0.823368	15.8871	6.72357e-05	0.000598653
12	At1g76540	Arath;CDKB2;1	Y	1.40074	3.12662	32.1919	1.39671e-08	2.85634e-07
13	At1g20930	Arath;CDKB2;2	Y	1.16657	1.63413	13.732	0.00021083	0.00161743
14	At2g25880	Aurora-like kinase 1; ALK1	Y	0.667574	3.11768	8.93781	0.00279327	0.01455
15	At4g32830	Aurora-like kinase 2; ALK2	Y	1.4928	1.89902	23.6572	1.15114e-06	1.62919e-05
16	At5g55830	L-Lectin kinase	N	N	N	N	N	N
17	At5g11510	AtMYB3R4	Y	1.24245	2.55863	22.5346	2.0639e-06	2.75006e-05
18	At1g08560	syntaxin-related protein KNOLLE	Y	0.853408	3.54088	10.5808	0.00114268	0.00689921
19	At1g18370	kinesin (AtNACK1); HINKEL	Y	1.64771	2.76212	38.7934	4.71115e-10	1.23365e-08
20	At5g23910	kinesin	Y	0.792014	2.07597	8.23322	0.00411306	0.0201286
21	At5g02370	kinesin	Y	1.94919	1.83588	37.9815	7.14172e-10	1.81649e-08
22	At3g20150	kinesin	Y	1.37081	2.53518	27.1072	1.92478e-07	3.22397e-06
23	At5g60930	kinesin	Y	1.28011	3.36224	29.6244	5.24403e-08	9.74172e-07
24	At2g28620	kinesin	Y	1.72159	2.50842	39.3776	3.49286e-10	9.38884e-09
25	At2g22610	kinesin	Y	1.09885	2.18678	14.8127	0.000118733	0.000984311
26	At2g47500	kinesin	N	N	N	N	N	N
27	At1g59540	kinesin	Y	0.821568	1.96752	8.5815	0.00339595	0.0171359
28	At1g72250	kinesin	Y	0.957735	2.575	12.6337	0.000378854	0.00269296
29	At3g23670	kinesin	Y	1.64537	2.56207	37.432	9.46544e-10	2.36514e-08
30	At4g05190	kinesin	Y	1.36928	2.67674	26.4125	2.75754e-07	4.48474e-06
31	At4g26660	kinesin-like	Y	1.94841	2.25456	36.0101	1.96299e-09	4.61259e-08
32	At5g55520	kinesin-like	Y	1.81961	1.92102	31.3774	2.12438e-08	4.22278e-07
33	At5g67270	microtubule-associated protein EB1-like protein	Y	1.21161	2.16576	19.4274	1.04495e-05	0.000117083
34	At5g51600	microtubule-associated protein; AtMAP65-3	N	N	N	N	N	N
35	At3g60840	microtubule-associated protein; AtMAP65-4	Y	0.920723	2.12967	11.4121	0.000729671	0.00472588
36	At4g11080	98b like protein, HMG	Y	1.3754	2.36258	21.9196	2.84318e-06	3.66839e-05
37	At4g23800	98b like protein, HMG; ABF2-like	Y	1.59249	4.38224	63.2782	1.79484e-15	8.68416e-14
38	At4g33260	WD-repeat protein; CDC20-like	Y	1.44887	2.35189	28.4793	9.47063e-08	1.68017e-06
39	At5g13840	CCS52b; cell cycle switch protein	Y	1.46389	2.4193	27.757	1.37552e-07	2.37419e-06
40	At1g50490	cyclin-specific ubiquitin carrier protein; E2; UBC20	Y	0.631947	3.28665	8.47219	0.00360617	0.0180597
41	At3g25980	putative mitotic checkpoint protein; MAD2-like	Y	2.57836	1.75258	45.2227	1.75855e-11	5.55456e-10
42	At3g19590	mitotic checkpoint protein, putative; BUB3-like	N	N	N	N	N	N
43	At2g33560	BUBR1-like	Y	1.66315	1.05499	20.0755	7.4446e-06	8.66572e-05
44	At1g69400	mitotic checkpoint protein, putative	N	N	N	N	N	N
45	At4g33400	Vid27-related protein	Y	0.615341	3.86246	9.38908	0.00218281	0.0118636
46	At3g23890	topoisomerase II	Y	1.51862	4.28616	58.6171	1.91548e-14	8.47787e-13
47	At3g51280	Tetratricopeptide repeat (TPR)-like superfamily protein	Y	1.75988	1.94544	33.4026	7.49253e-09	1.59031e-07
48	At1g02730	cellulose synthase catalytic subunit, putative	Y	1.62269	4.05017	57.4467	3.47262e-14	1.50262e-12
49	At2g25060	early nodulin-like predicted GPI-anchored protein	Y	2.03004	3.09225	64.1191	1.17123e-15	5.7852e-14
50	At1g75920	family II lipase EXL5 (EXL5)	N	N	N	N	N	N
51	At3g03090	sugar transporter-like	N	N	N	N	N	N
52	At3g14190	expressed protein, CMR1	Y	1.23559	1.41923	11.7688	0.000602324	0.0040285
53	At4g15830	expressed protein, ARM repeat superfamily protein	Y	1.37357	1.58535	14.7461	0.000122999	0.00101128
54	At4g02800	expressed protein	Y	1.67359	2.01556	29.5435	5.46764e-08	1.01042e-06
55	At4g28430	Reticulon family protein	N	N	N	N	N	N
56	At3g26050	TPX2 (targeting protein for Xklp2) protein family	Y	1.53171	0.688333	14.5948	0.000133284	0.00108177
57	At1g33940	hypothetical protein	N	N	N	N	N	N
58	At4g22860	microtubule-associated protein	Y	0.970813	1.52217	9.31446	0.00227352	0.0122565
59	At2g38160	hypothetical protein	Y	1.96478	0.893085	19.6474	9.31275e-06	0.000105682
60	At2g44190	ENDOSPERM DEFECTIVE 1	N	N	N	N	N	N
61	At1g03780	TPX2 ((targeting protein for Xklp2)	Y	1.84009	2.24789	37.38	9.72124e-10	2.41667e-08
62	At1g34355	PARALLEL SPINDLE 1 (PS1)	Y	1.47045	1.45378	18.0823	2.11555e-05	0.00021768
63	At3g27330	hypothetical protein	Y	1.03685	1.51206	7.46032	0.00630739	0.0286063
64	At2g20590	Reticulon family protein	Y	2.96363	0.263267	32.2566	1.35095e-08	2.7761e-07
65	At1g23790	hypothetical protein	Y	2.04384	0.63687	22.5536	2.04356e-06	2.72909e-05
66	At3g03130	hypothetical protein	Y	1.86705	1.86084	26.0346	3.35359e-07	5.38827e-06
67	At3g12870	hypothetical protein	Y	1.80518	1.01401	21.0072	4.57552e-06	5.65342e-05
68	At4g01730	DHHC-type zinc finger family protein	Y	1.45852	1.50492	17.3021	3.1884e-05	0.000312801
69	At5g33300	kinesin related	Y	0.745023	1.88476	6.53411	0.0105825	0.0431759
70	At4g28230	putative protein	N	N	N	N	N	N
71	At3g55660	ROPGEF6	Y	1.76782	1.24031	18.1508	2.04083e-05	0.0002105
72	At5g15510	TPX2 (targeting protein for Xklp2) protein family	Y	1.36404	1.22902	14.4404	0.000144663	0.00116216
73	At5g36710	putative protein	Y	1.65709	1.58284	24.1754	8.79492e-07	1.28684e-05
74	At5g48310	putative protein	Y	1.2191	1.5993	14.9928	0.000107925	0.000907428
75	At5g66230	Chalcone-flavanone isomerase family protein	Y	1.93623	2.18249	44.2924	2.82817e-11	8.77682e-10
76	At5g17160	putative protein	Y	1.6388	3.15707	43.7079	3.81229e-11	1.16109e-09
77	At5g62550	unknown protein	Y	1.00921	2.93893	16.0449	6.18588e-05	0.000556849
78	At1g61450	unknown protein	Y	1.46109	-0.574766	7.52457	0.0060863	0.027801
79	At4g05520	Eps15 homology domain proteins involved in endocytosis	Y	2.06365	2.53795	54.4548	1.59066e-13	6.3534e-12
80	At2g16270	unknown protein	N	N	N	N	N	N
81	At5g45700	Haloacid dehalogenase-like hydrolase (HAD) superfamily protein	Y	2.25182	0.994873	30.3769	3.56e-08	6.84e-07
82	At3g02640	unknown protein	Y	1.56319	2.83744	34.0079	5.48885e-09	1.20342e-07
